# Supplementary material for: International safeguards for the final disposal of spent nuclear fuel – why, what and how
Source: Copernicus journal article supplement (doi:10.5194/sand-1-241-2021), 2021-11-10
Supplement: Supplementary file 1 [file sand-1-241-2021-supplement.pdf]

Supplement of Saf. Nucl. Waste Disposal, 1, 241–242, 2021  
<https://doi.org/10.5194/sand-1-241-2021-supplement>  
© Author(s) 2021. CC BY 4.0 License.

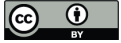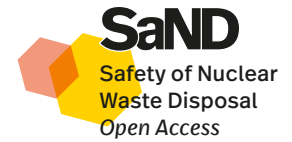

*Supplement of*

## **International safeguards for the final disposal of spent nuclear fuel – why, what and how**

**Irmgard Niemeyer et al.**

*Correspondence to:* Irmgard Niemeyer ([i.niemeyer@fz-juelich.de](mailto:i.niemeyer@fz-juelich.de))

The copyright of individual parts of the supplement might differ from the article licence.



# INTERNATIONAL SAFEGUARDS FOR THE FINAL DISPOSAL OF SPENT NUCLEAR FUEL – WHY, WHAT AND HOW

11.11.2021 |

I. NIEMEYER, K. AYMANN, G. DEISSMANN, D. BOSBACH

Institute of Energy and Climate Research, IEK-6: Nuclear Waste Management

Member of the Helmholtz Association

**SESSION 4A EN**  
**Activities in international research  
programs and collaborations**

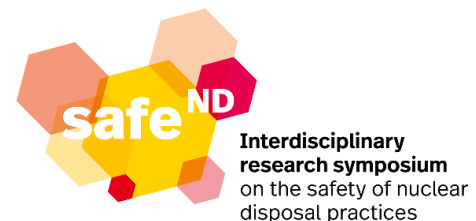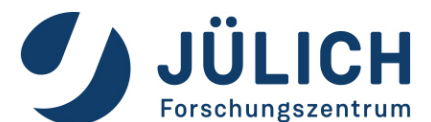

# NUCLEAR SAFEGUARDS

To deter the spread of nuclear weapons by the early detection of the misuse of nuclear material or technology

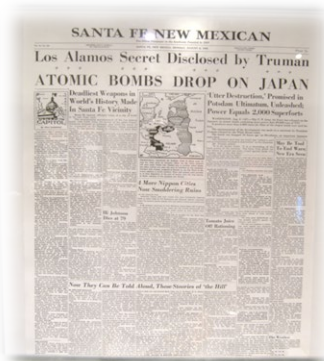

After the **first nuclear bomb was dropped on Hiroshima on 6 August 1945**, US-President Harry Truman unveiled the top-secret **Manhattan Project**.

Treaty on the Non-Proliferation of Nuclear Weapons (NPT), 1970

Non-proliferation (Art. I & II),  
**Safeguards** (Art. III)

Peaceful use of nuclear energy (Art. IV & V)

Disarmament (Art. VI)

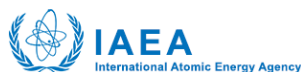

**Atoms for Peace Speech**  
US-President Dwight D. Eisenhower, UN General Assembly, 8 December 1953

Generic safeguards objectives

To detect any diversion of declared nuclear material at declared facilities or locations outside facilities where nuclear material is customarily used (LOFs)

To detect any undeclared production or processing of nuclear material at declared facilities or LOFs

To detect any undeclared nuclear material or activities in the state as a whole



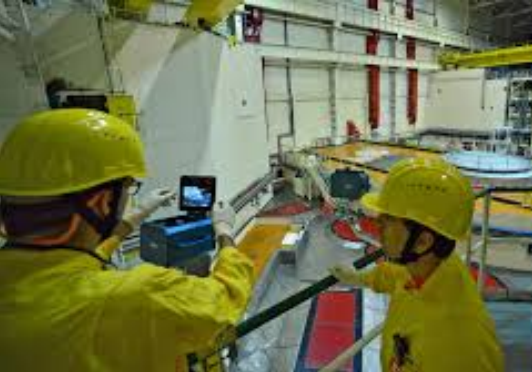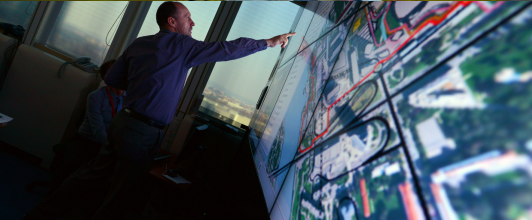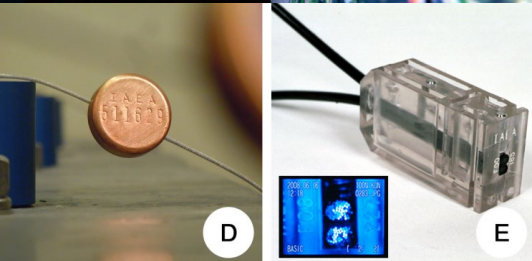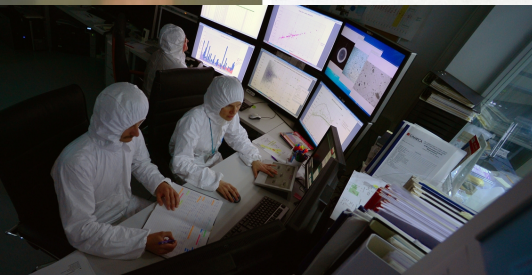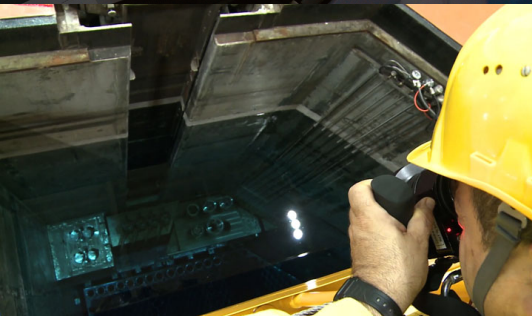

# IAEA Safeguards in 2020

Verifying the peaceful use of nuclear material

**184 States**  
with safeguards agreements in force  
of which

**136 States**  
had additional protocols in force

**31 States**  
with comprehensive safeguards agreements and original small quantities protocols

**63 States**  
with comprehensive safeguards agreements and amended small quantities protocols

**221 432**  
significant quantities of nuclear material

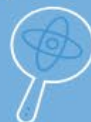

**1 321**  
nuclear facilities and locations outside facilities

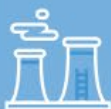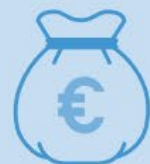

**145 million**  
regular budget  
+27 million extra budgetary

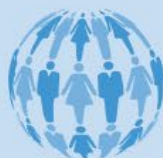

**875 staff**  
from 95 countries

Conducted  
**2 856**  
in-field verifications

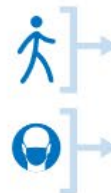

**12 767**  
days in the field

Verified  
**23 600 seals**  
applied to nuclear material, facility critical equipment or IAEA's safeguards equipment at nuclear facilities

**2 362**  
days under quarantine in country

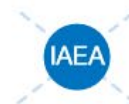

Collected  
**460**  
environmental samples  
**489**  
nuclear material samples

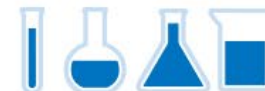

Acquired  
**1 264**  
commercial satellite images

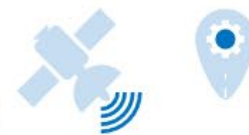

Remotely monitored  
**142**  
facilities

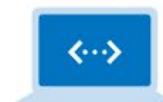

Utilized  
**1 038**  
non-destructive assay systems for the measurement of nuclear material

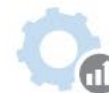

Maintained  
**1 530**  
surveillance cameras at nuclear facilities

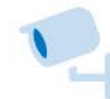

We concluded that for ...

**72 States**  
*all nuclear material remained in peaceful activities*

**103 States**  
*declared nuclear material remained in peaceful activities*

**3 States**  
*nuclear material, facilities or other items to which safeguards had been applied remained in peaceful activities*

**5 States**  
*nuclear material in selected facilities to which safeguards had been applied remained in peaceful activities*

# INTERNATIONAL COLLABORATION IN SAFEGUARDS

## Member State Support Programmes in IAEA Safeguards

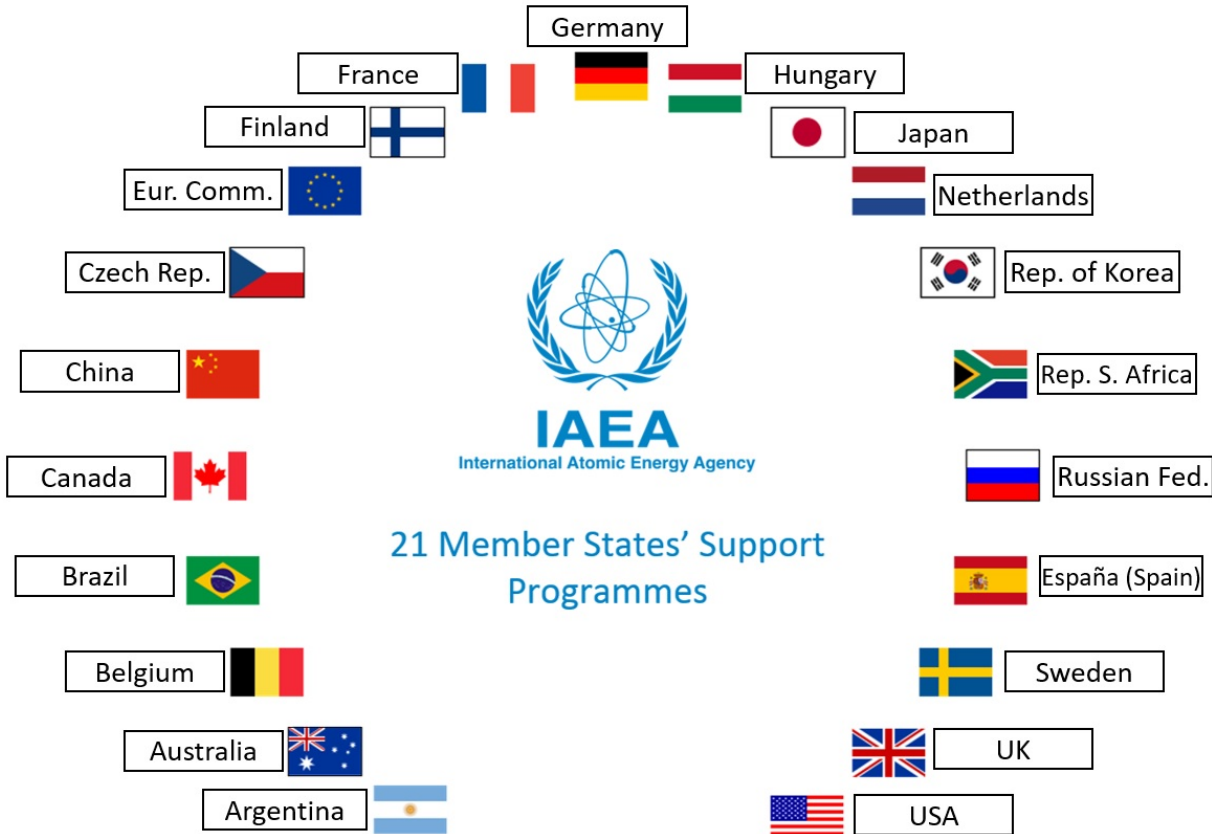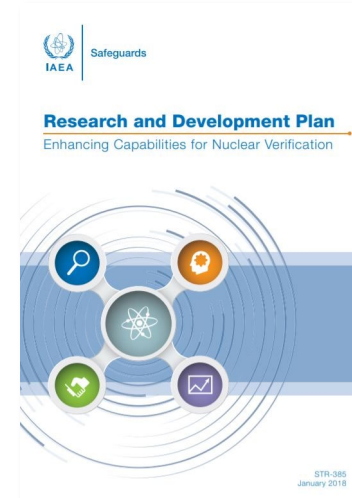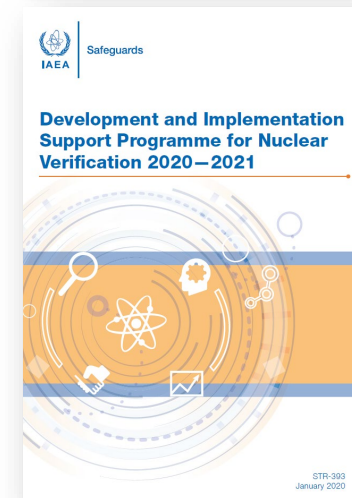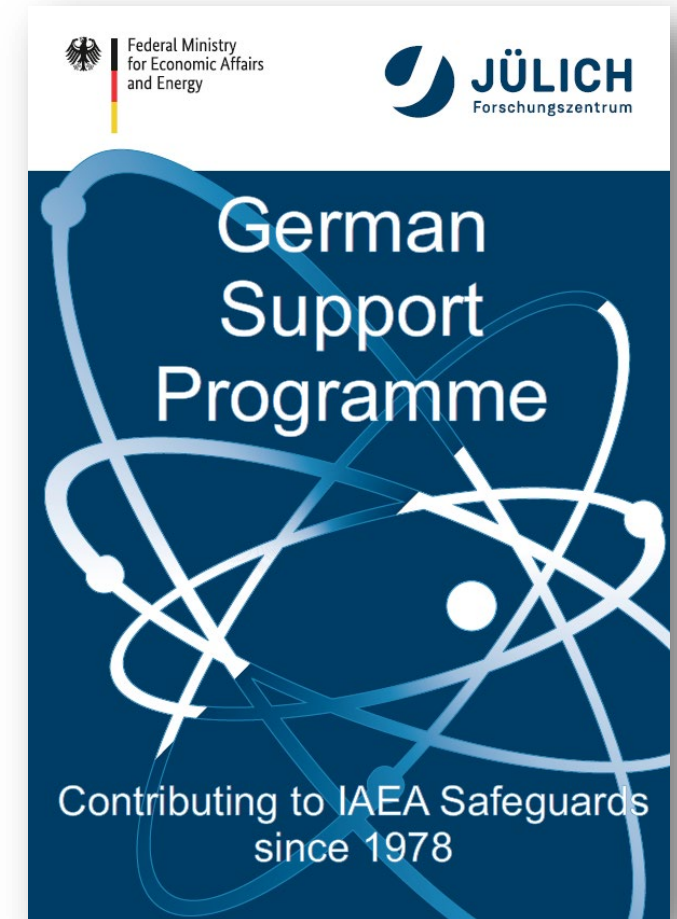



# INTERNATIONAL COLLABORATION IN SAFEGUARDS

## Safeguarding final disposal of spent nuclear fuel - Overview

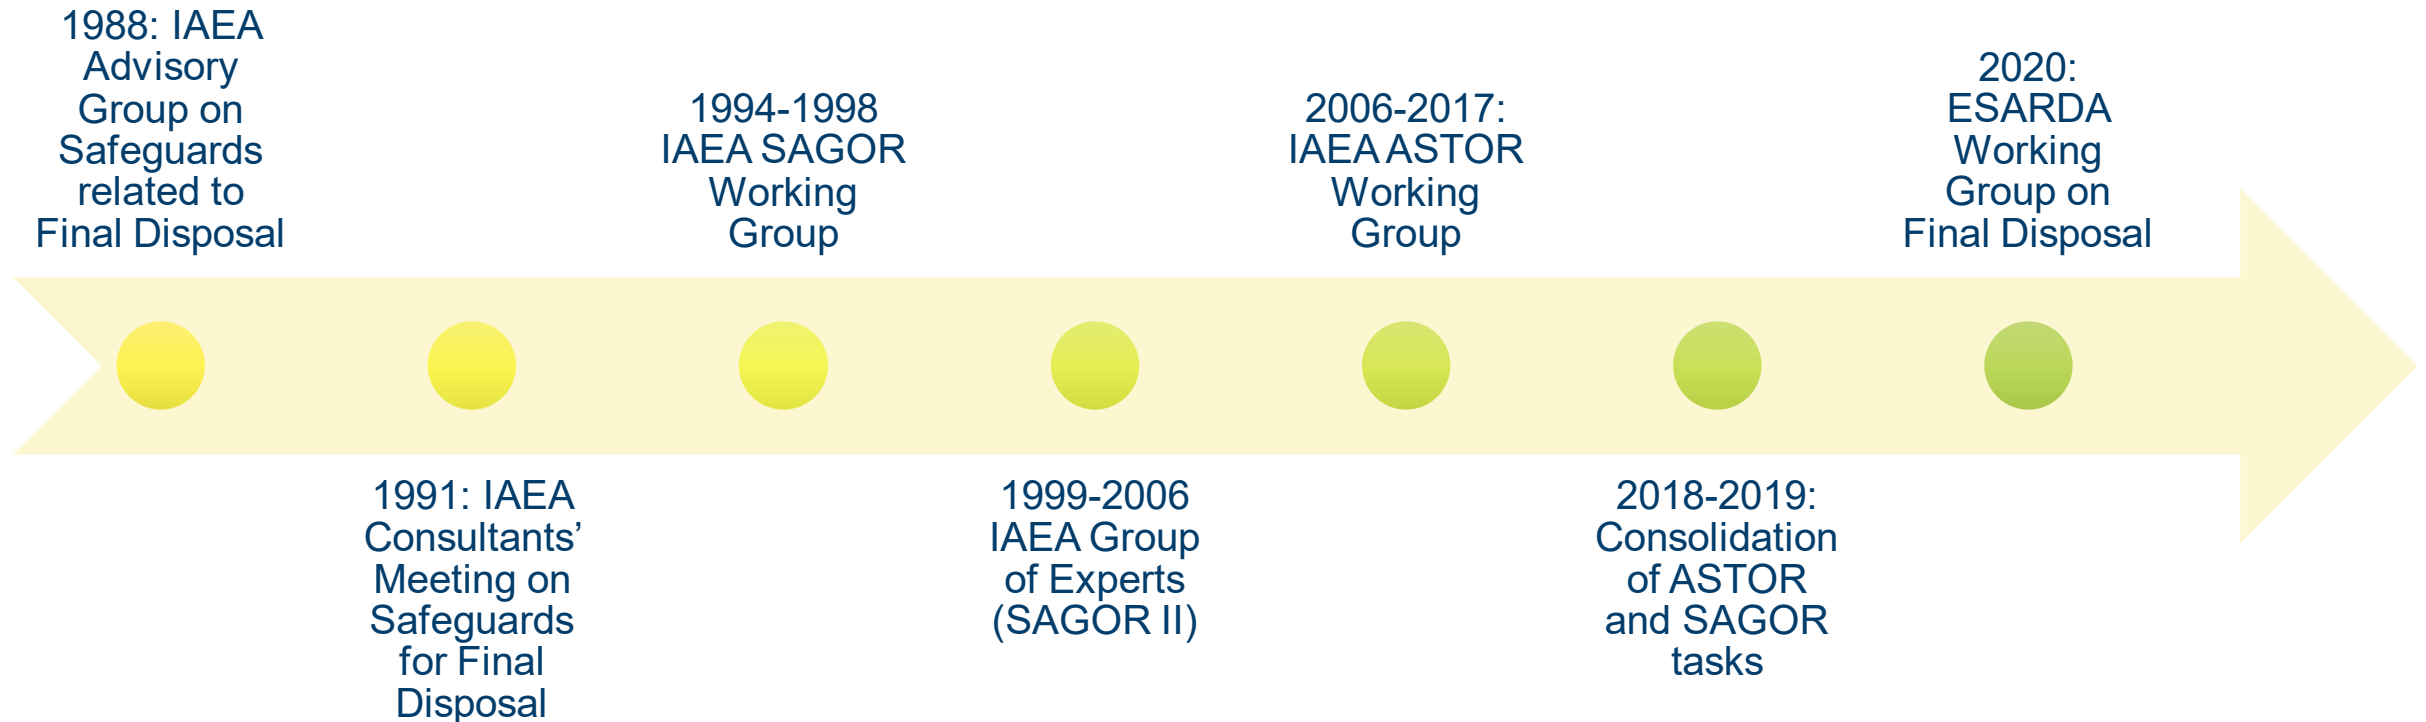

SAGOR : Safeguards for Geological Repositories  
ASTOR: Application of Safeguards to Geological Repositories  
ESARDA: European Safeguards Research and Development Association

# SAGOR (1994-1998) & SAGOR II (1999-2006)

Safeguards for Geological Repositories: Reports and activities

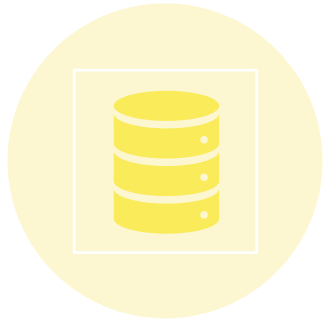

**SAGOR**

STR-312 (1998): Safeguards for the Final Disposal of Spent Fuel in Geological Repositories

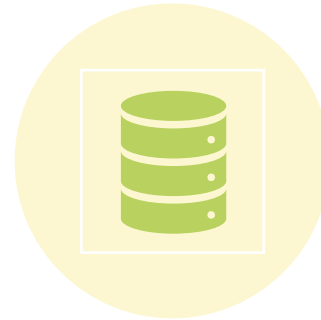

**SAGOR II**

STR-324 (2000): The Use of Geophysical Techniques for Safeguarding Geological Repositories

STR-338 (2003): Interface Issues and Interaction Between Safeguards and Radioactive Waste Management in the Context of Geological Repositories

# ASTOR (2006-2017)

## Application of Safeguards to Geological Repositories: Reports and activities



**ASTOR**

STR-384 (2017):  
Technologies  
Potentially Useful  
for Safeguarding  
Geological  
Repositories

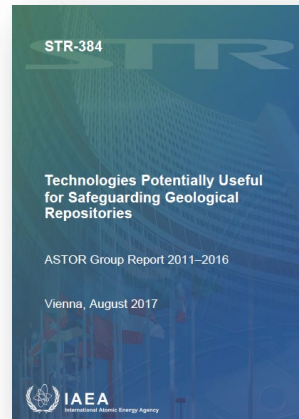

### Technology principle and brief description

- Technology readiness level
- Technology limitations
- Estimated costs
- Sustainability, standardization, supply chain
- Ease of use / operator skill / infrastructure needs
- Data validation / authentication
- Expected 'Alarm' rates

### Technologies

- Design Information Verification (DIV)
- Non-destructive analysis (NDA) verification
- Containment and surveillance (C/S) measures and canister ID
- Satellite imagery
- Geophysical techniques (i.a. seismic detection, directional radar technology)
- Long-term management of safeguards-related data



# DESIGN INFORMATION VERIFICATION (DIV)

## Detection of undeclared constructions

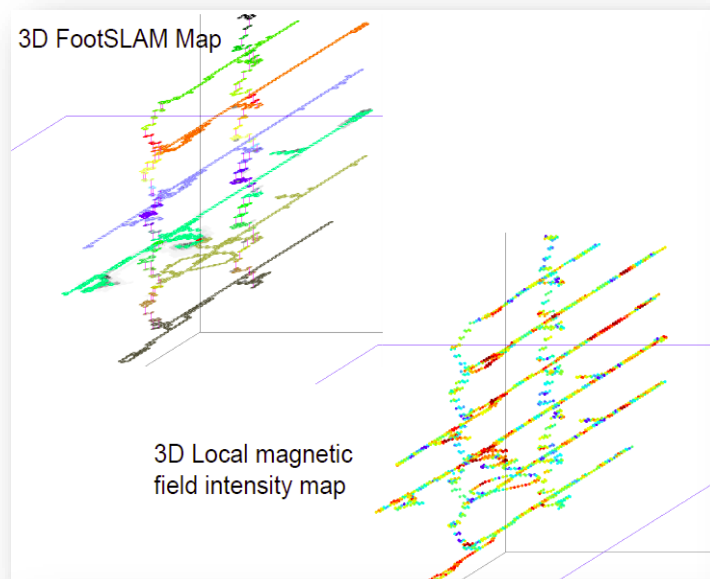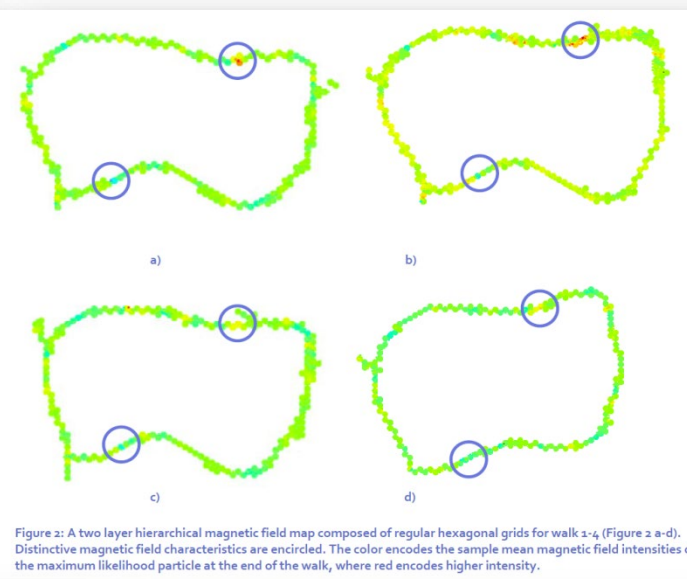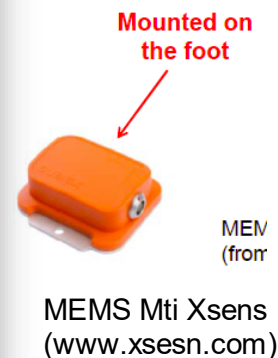

## Simultaneous location and mapping (SLAM) (GER-DLR)

S. Kaiser, E. Munoz Diaz, P. Robertson (2016): **Study on the Feasibility of FootSLAM for Use During Safeguards Verification Activities.** JOPAG/03.16-PRG-423

S. Kaiser, E. Munoz Diaz (2016): **FootSLAM2: Enhancing IAEA's Navigation Algorithm for use in Complementary Access Inspections.** JOPAG/03.16-PRG-424

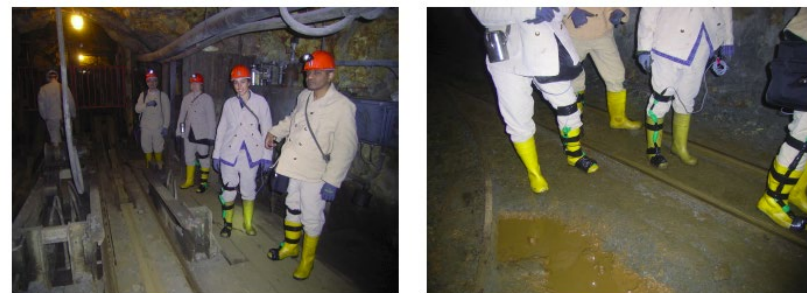

Figure 1: Left: Five DLR employees within the active graphite mine in Kropfmühl close to Passau wearing special clothes and helmets; Right: Special waterproof fixation of the sensors at the rubber boots.

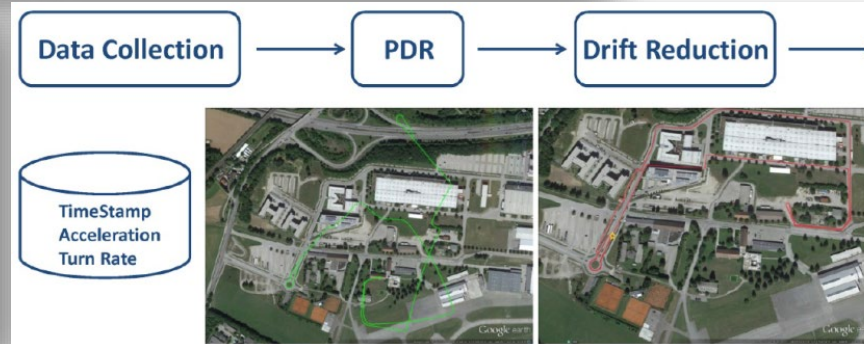



# SATELLITE IMAGERY (SI)

Change detection, deformation analysis

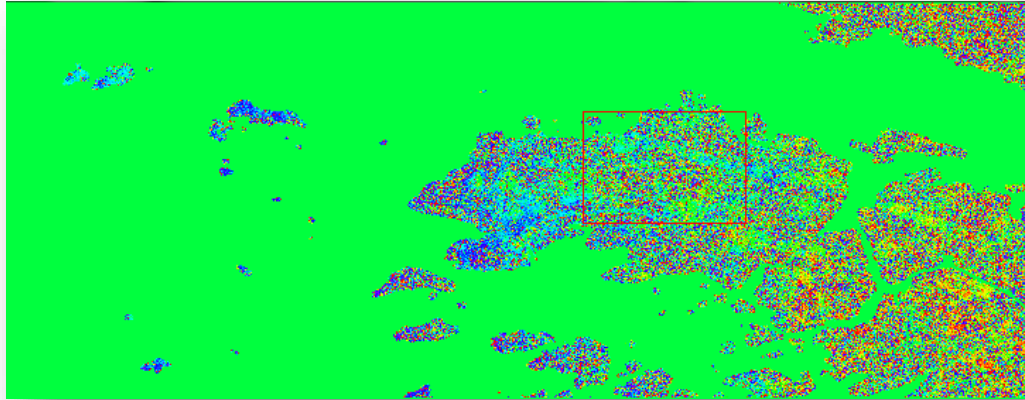

$-2\pi$    $2\pi$

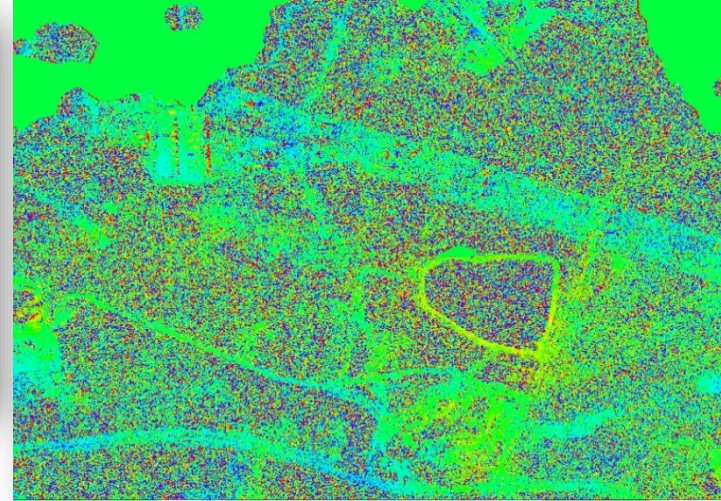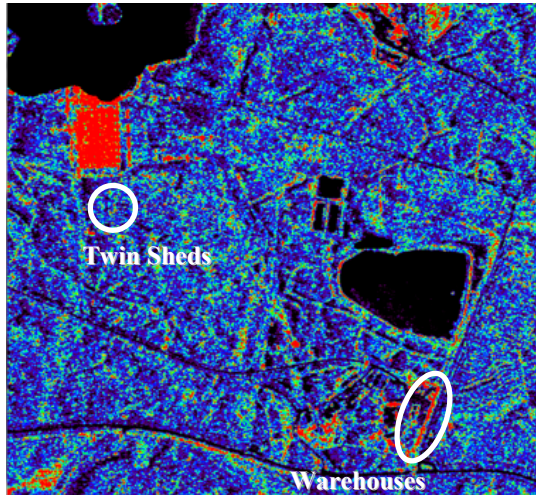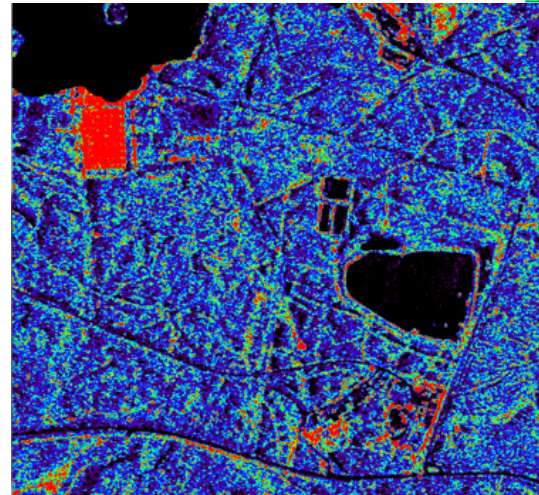

TerraSAR-X images acquired at May 23 (right) and June 3 (left)

Top: Interferogramm

Left: Color-coded backscatter intensity

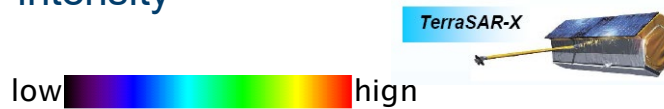

Application of SAR interferometry and non-coherent change detection techniques (CAN/FIN/GER-Jülich/JPN)

I. Niemeyer, O. Okko, B. Moran, D. Davainius (2018): **Safeguarding Geological Repositories Using Geophysical Monitoring and Satellite Imagery**. Proc. of the INMM Annual Meeting 2018



# GEOPHYSICAL TECHNIQUES

## Detection of undeclared / unauthorised activities

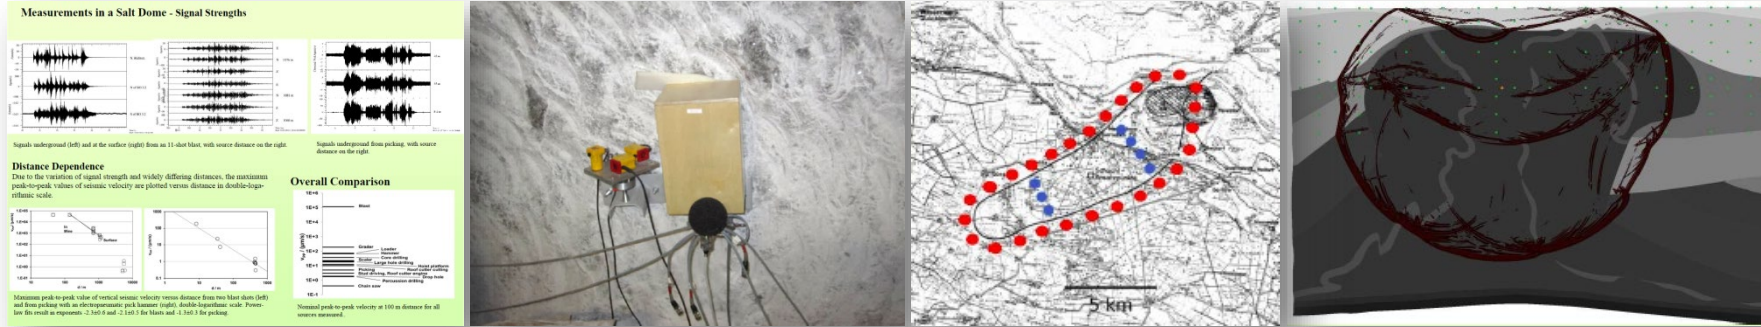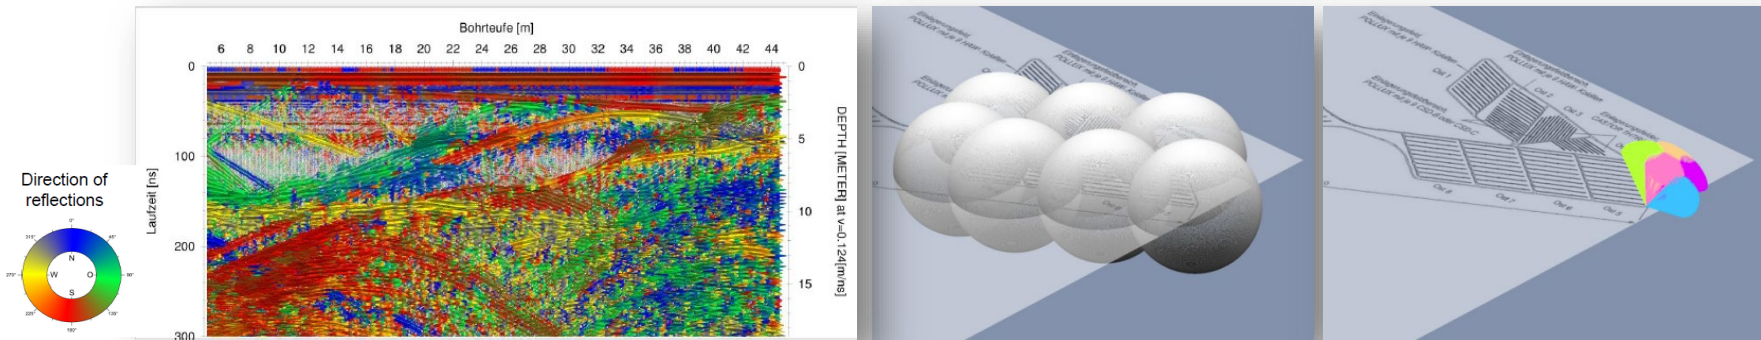

## Acoustic and seismic monitoring (GER-TU Dortmund)

J. Altmann, H. Kühnicke (2015): **Acoustic and Seismic Measurements for the Detection of Undeclared Activities at Geological Repositories. Results from the Gorleben Exploratory Mine.** JOPAG/11.13-PRG-404

J. Altmann (2015): **Modelling of Seismic-Wave Propagation at a Salt Dome. Final Report.** JOPAG/12.15-PRG-422

## Directive underground radar (GER-DMT)

C. Holst, D. Orlowsky, S. Uchtmann (2017): **Applicability of the directional radar technology for safeguards monitoring nuclear repositories in geological formations.** Proc. ESARDA Symposium, Düsseldorf, 2017

# CONSOLIDATION OF SAGOR AND ASTOR RECOMMENDATIONS (2018-2019)



To support the Agency's knowledge management for future generations of safeguards staff in future geological repository programs

**Consolidation**

| QUESTIONS AND ANSWERS REGARDING GEOLOGICAL REPOSITORY SYSTEM SAFEGUARDS IMPLEMENTATION                                                                                                    |    |
|-------------------------------------------------------------------------------------------------------------------------------------------------------------------------------------------|----|
| ACRONYMS AND ABBREVIATIONS .....                                                                                                                                                          | 4  |
| HISTORY .....                                                                                                                                                                             | 7  |
| 1. How did the international Atomic Energy Agency (IAEA) take into account Member States' facility designs in the development of IAEA safeguards for geological repository systems? ..... | 7  |
| 2. What is the purpose of the Policy Paper 15 and the model integrated safeguards approaches for encapsulation plants and geological repositories? .....                                  | 7  |
| 3. What were SAGOR's and ASTOR's responsibilities in establishing IAEA safeguards policy and practices? .....                                                                             | 8  |
| 4. How does the purpose differ between ASTOR Programme and the Encapsulation Plant and Geological Repository (EPGR) Working Group? .....                                                  | 8  |
| DEFINITIONS .....                                                                                                                                                                         | 9  |
| 5. What is the difference between a spent fuel "conditioning plant" and a spent fuel "encapsulation plant" and what does "consolidation" mean? .....                                      | 9  |
| 6. What is the difference between a geological repository, a geological repository facility, and a geological repository site? .....                                                      | 10 |
| 7. What is the definition of each phase of the life cycle of a geological repository? .....                                                                                               | 11 |
| 8. When is a repository determined to be 'closed' (for purposes of safeguards)? .....                                                                                                     | 11 |
| 9. What is the definition of 'difficult to dismantle'? .....                                                                                                                              | 12 |
| 10. What is the definition of 'difficult to access'? .....                                                                                                                                | 12 |
| 11. What are the requirements for verification of nuclear material that is difficult to access? .....                                                                                     | 12 |
| 12. What is the safeguards meaning of "containment" in the case of a geological repository? .....                                                                                         | 12 |
| 13. What is the meaning of 'verified' as it pertains to a pre-operational repository or to spent fuel to be or being emplaced in a geological repository? .....                           | 13 |
| GENERAL POLICY .....                                                                                                                                                                      | 13 |
| 14. Why does safeguards not terminate on spent fuel when it is emplaced in a backfilled and closed geological repository? .....                                                           | 13 |
| 15. How can safeguards be implemented more efficiently in geological repository systems in States with a broader conclusion? .....                                                        | 14 |
| <b>44 Q&amp;A's</b>                                                                                                                                                                       |    |

| REFERENCE DOCUMENTS                                                                                                                                                                                                                                                                                               |    |
|-------------------------------------------------------------------------------------------------------------------------------------------------------------------------------------------------------------------------------------------------------------------------------------------------------------------|----|
| <b>Contents</b>                                                                                                                                                                                                                                                                                                   |    |
| I. POLICY PAPERS AND BOARD OF GOVERNORS REPORTS .....                                                                                                                                                                                                                                                             | 8  |
| 1. INFCIRC/153 (Corrected), THE STRUCTURE AND CONTENT OF AGREEMENTS BETWEEN THE AGENCY AND STATES REQUIRED IN CONNECTION WITH THE TREATY ON THE NON-PROLIFERATION OF NUCLEAR WEAPONS, International Atomic Energy Agency, June 1972. ....                                                                         | 8  |
| 2. INFCIRC/540 (Corrected), MODEL PROTOCOL ADDITIONAL TO THE AGREEMENT(S) BETWEEN STATE(S) AND THE INTERNATIONAL ATOMIC ENERGY AGENCY FOR THE APPLICATION OF SAFEGUARDS, International Atomic Energy Agency, September 2005. ....                                                                                 | 8  |
| 3. INFCIRC/254/Rev 12/Part 1, COMMUNICATION RECEIVED FROM THE PERMANENT MISSION OF THE CZECH REPUBLIC TO THE INTERNATIONAL ATOMIC ENERGY AGENCY REGARDING CERTAIN MEMBER STATES' GUIDELINES FOR THE EXPORT OF NUCLEAR MATERIAL, EQUIPMENT AND TECHNOLOGY, International Atomic Energy Agency, November 2013. .... | 8  |
| 4. SUBSIDIARY ARRANGEMENT TO THE AGREEMENT BETWEEN THE GOVERNMENT OF [ ..... ] AND THE INTERNATIONAL ATOMIC ENERGY AGENCY FOR THE APPLICATION OF SAFEGUARDS IN CONNECTION WITH THE TREATY ON THE NON PROLIFERATION OF NUCLEAR WEAPONS, 1974 .....                                                                 | 8  |
| 5. GOV/2014/41, SUPPLEMENTARY DOCUMENT TO THE REPORT ON THE CONCEPTUALIZATION AND DEVELOPMENT OF SAFEGUARDS IMPLEMENTATION AT THE STATE LEVEL (GOV/2013/38), 13 August 2014 .....                                                                                                                                 | 8  |
| 6. GOV/2017/23, SAFEGUARDS IMPLEMENTATION REPORT FOR 2016, 12 May 2017 .....                                                                                                                                                                                                                                      | 8  |
| 7. SG-OP-GNRL-PL-0010, POLICY PAPER 10: CONTAINMENT AND SURVEILLANCE, 2006 .....                                                                                                                                                                                                                                  | 9  |
| 8. SG-OP-GNRL-PL-0014, POLICY PAPER 14: TERMINATION OF SAFEGUARDS ON MEASURED DISCARDS; SAFEGUARDS ON RETAINED WASTE, 2008-12-22 .....                                                                                                                                                                            | 9  |
| 9. SG-OP-GNRL-PL-0015, POLICY PAPER 15: SAFEGUARDS FOR FINAL DISPOSAL OF SPENT FUEL IN GEOLOGICAL REPOSITORIES, Date of Entry into Force: 1997-06-19 .....                                                                                                                                                        | 9  |
| 10. SG-OP-GNRL-PL-0019, POLICY PAPER 19: INTEGRATED SAFEGUARDS FOR SPENT FUEL TRANSFERS TO DRY STORAGE, 6 March 2006 .....                                                                                                                                                                                        | 11 |
| 11. SG-OP-GNRL-PL-0020, POLICY PAPER 20: JOINT USE OF SAFEGUARDS EQUIPMENT BETWEEN THE IAEA AND AN EXTERNAL PARTY, 26 April 2006 .....                                                                                                                                                                            | 12 |
| II. MODEL APPROACHES AND GUIDANCE DOCUMENTS .....                                                                                                                                                                                                                                                                 | 13 |
| 12. INVS No. 3, IAEA SAFEGUARD Series, June 2002 .....                                                                                                                                                                                                                                                            | 13 |
| 13. SG-PR-1305, MODEL INTEGRATED SAFEGUARDS FOR AN ENCAPSULATION PLANT, 2010-10-10 .....                                                                                                                                                                                                                          | 13 |
| 14. SG-PR-1306, MODEL INTEGRATED SAFEGUARDS FOR A GEOLOGICAL REPOSITORY, 2011-02-10 .....                                                                                                                                                                                                                         | 13 |
| <b>93 references (incl. abstracts)</b>                                                                                                                                                                                                                                                                            |    |



# CONSOLIDATION OF SAGOR AND ASTOR

## RECOMMENDATIONS (2018-2019): ACHIEVEMENTS



Performed diversion path analysis for generic encapsulation plants and geological repositories

Identified potential safeguards detection points for each facility type and operating phase

Identified facility-specific technical objectives

Identified safeguards measures that could be used for each facility

Developed and assessed a safeguards approach based on IAEA Safeguards Criteria

Provided input and review of IAEA safeguards policy for spent fuel disposal

Identified research and development needs and reviewed status of related development tasks

Supported preparation of a model integrated safeguards approach for each facility type

### Consolidation

Supported preparation and testing of a design information questionnaire for each facility type

Provided input to a safeguards implementation 'road map' developed by the IAEA Department of Safeguards

Issued a report on the status of technologies that could be used for safeguarding encapsulation plants and geological repositories (STR-384)

# FURTHER R&D NEEDS

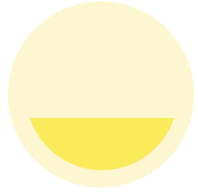

## Technologies

Establish performance requirements for the design of relevant safeguards technologies

Develop and test appropriate safeguards equipment

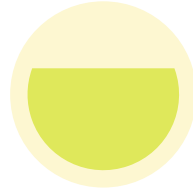

## Implementation

Determine specific information needs of stakeholders and develop appropriate guidance

Develop safeguards approaches under the State-level concept

Develop further approaches on 'Safeguards-by-Design' and the 'Safety-Security-Safeguards' (3S)

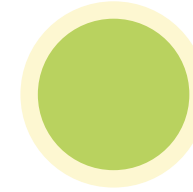

## Data and information management

Develop approaches on how information about disposed spent fuel and high-level nuclear waste should be managed, handled, organized, archived, read, interpreted, and secured for the long term (for centuries after repository closure and beyond)

# SAFEGUARDING A GEOLOGICAL REPOSITORY IN GERMANY

## Responsibilities

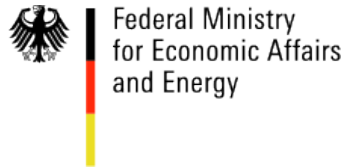

Germany does not have a national safeguards authority of its own and does not carry out safeguards inspections on its own. Sovereign rights in this field were transferred to the EC (DG Energy, EURATOM). EURATOM is the owner of all nuclear fuel in the EU.

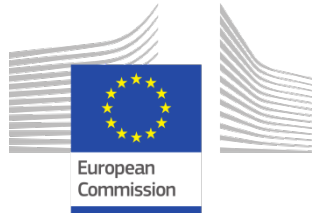

The Federal Ministry for Economic Affairs and Energy (BMWi) holds the overall political responsibility as to maintaining any interferences of safeguards activities with domestic regulations.

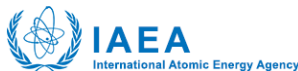

EURATOM acts as multinational safeguards authority and is the direct contact for the IAEA on the one hand and the operators on the other within the framework of the verification agreement between the IAEA, EURATOM and the EU member states (INFCIRC/193).

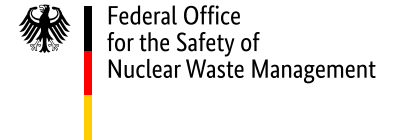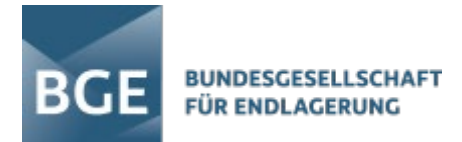

# REFERENCE CONCEPT FOR NUCLEAR MATERIAL SAFEGUARDS IN A GEOLOGICAL REPOSITORY FOR SPENT NUCLEAR FUEL (1993)

[JOPAG/12.93-PRG-205, 1993]

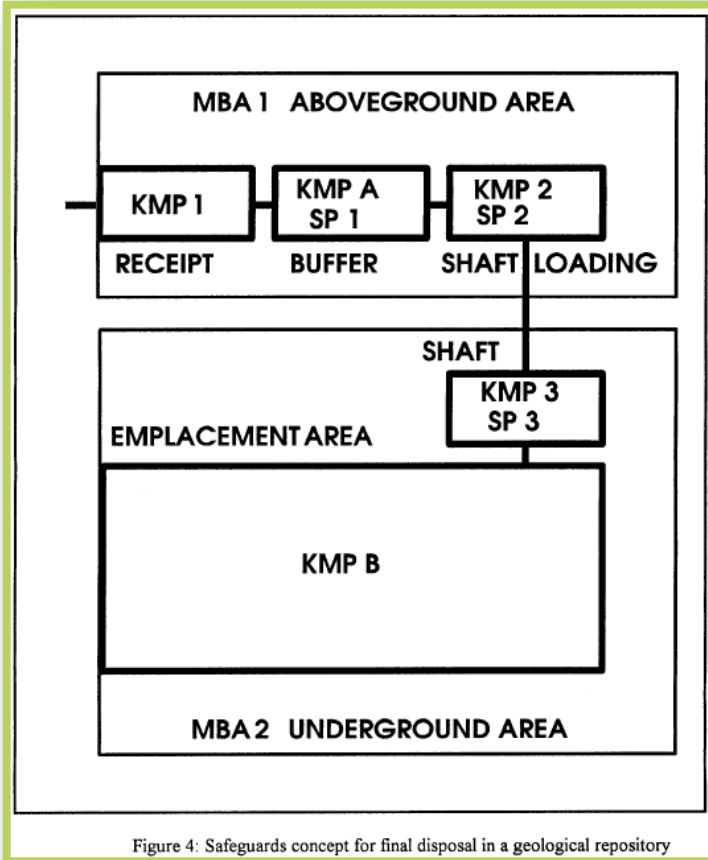

**KMP:** Key Measurement Point  
**MBA:** Material Balance Area  
**SP:** Strategic Point

## MBA 2:

- Accounting and re-examination of the plant design data
- No containment/surveillance measures
- No inspection activities

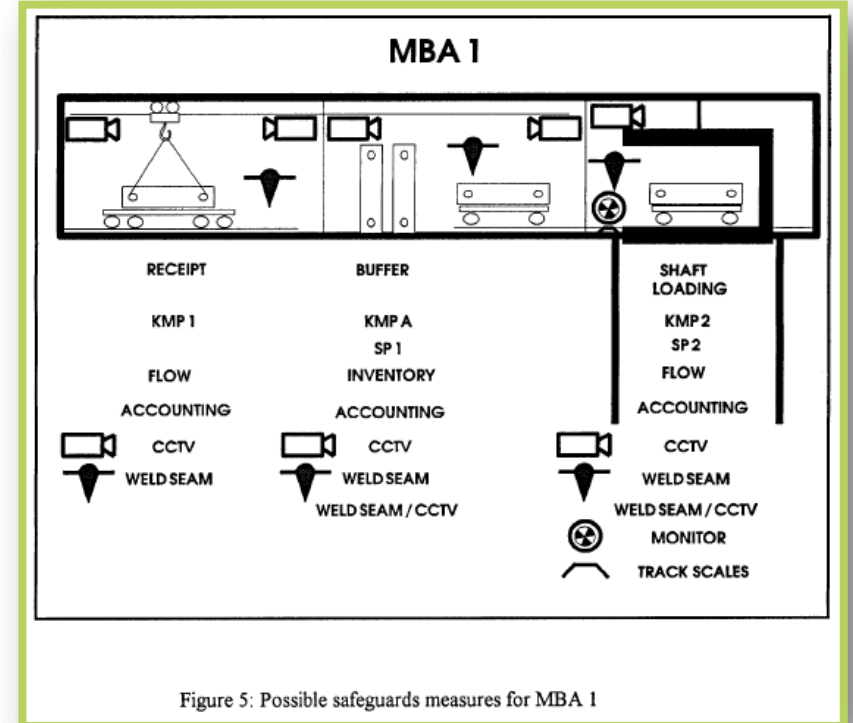



# UPDATING THE SAFEGUARDS CONCEPT

Taking into account the 2010 safety requirements (recoverability, retrievability)

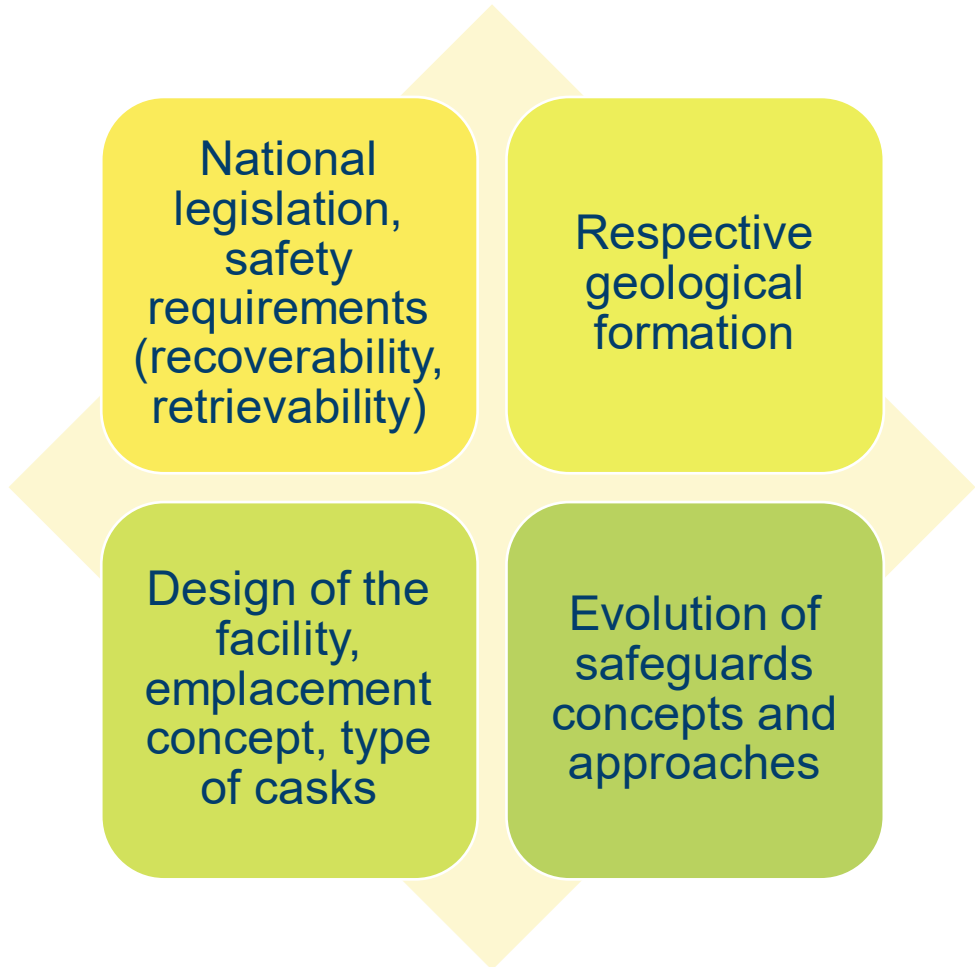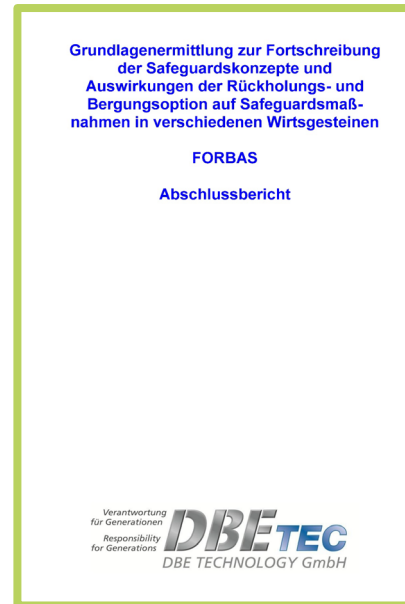

The State-level approach (SLA) for Germany will address the safeguards measures and activities for the geological repository. The given SLA for Germany will be updated in the different lifecycle phases of the repository.



Thank you for your attention.

Dr. Irmgard Niemeyer

Nuclear Waste Management **IEK-6**  
Institute of Energy and Climate Research

Email: [i.niemeyer@fz-juelich.de](mailto:i.niemeyer@fz-juelich.de)
